# Supplementary material for: Health Effects of Drinking Water Produced from Deep Sea Water: A Randomized Double-Blind Controlled Trial
Source: MDPI journal article supplement (doi:10.3390/nu14030581), 2022-01-28
Supplement: s1 [file s1]

**Supplementary Table S1.** Nutrition facts of Dydo-MIU, hardness, 88 (100mL).

| Composition (mg) |               |                 |                  |
|------------------|---------------|-----------------|------------------|
| Sodium (1.4)     | Calcium (0.6) | Magnesium (1.8) | Potassium (0.9)  |
| Total fat (0)    | Protein (0)   | Sugar (0)       | Carbohydrate (0) |
| Calories (0)     |               |                 |                  |
| Ca:Mg = 1:3      |               |                 |                  |
